# Supplementary material for: Chitosan functionalized gold nanostars as a theranostic platform for intracellular microRNA detection and photothermal therapy
Source: Royal Society of Chemistry journal article supplement (doi:10.1039/d3tb02029k), 2023-01-01
Supplement: d3tb02029k1.pdf [file d3tb02029k1.pdf]

## Supporting Information

### Chitosan functionalized gold nanostar as theranostic platform for intracellular microRNA detection and photothermal therapy

*Xiaoxue Dong, Zongwei Zhu, Qian Sun, Hongqian Zhang, Chuanxu Yang\**

**Table S1.** Sequences of DNA or RNA used

| Name           | Sequence 5'-3'                                         |
|----------------|--------------------------------------------------------|
| hpDNA          | BHQ1-GCG CGT CAA CAT CAG TCT GAT AAG<br>CTA CGC GC-FAM |
| fDNA           | GCG CGT CAA CAT CAG TCT GAT AAG CTA<br>CGC GC-FAM      |
| dsDNA-Capturer | TCA ACA TCA GTC TGA TAA GCT A-BHQ1                     |
| dsDNA-Reporter | FAM-TAG CTT ATC AGA CTG A                              |
| miR21          | UAG CUU AUC AGA CUG AUG UUG A                          |
| mis-miR21      | UAG CUU AUG ACA GUG AUC UUG A                          |
| miR155         | UUA AUG CUA AUU GUG AUA GGG GU                         |
| miR25          | CAU UGC ACU UGU CUC GGU CUG A                          |
| miR93          | CAA AGU GCU GUU CGU GCA GGU AG                         |

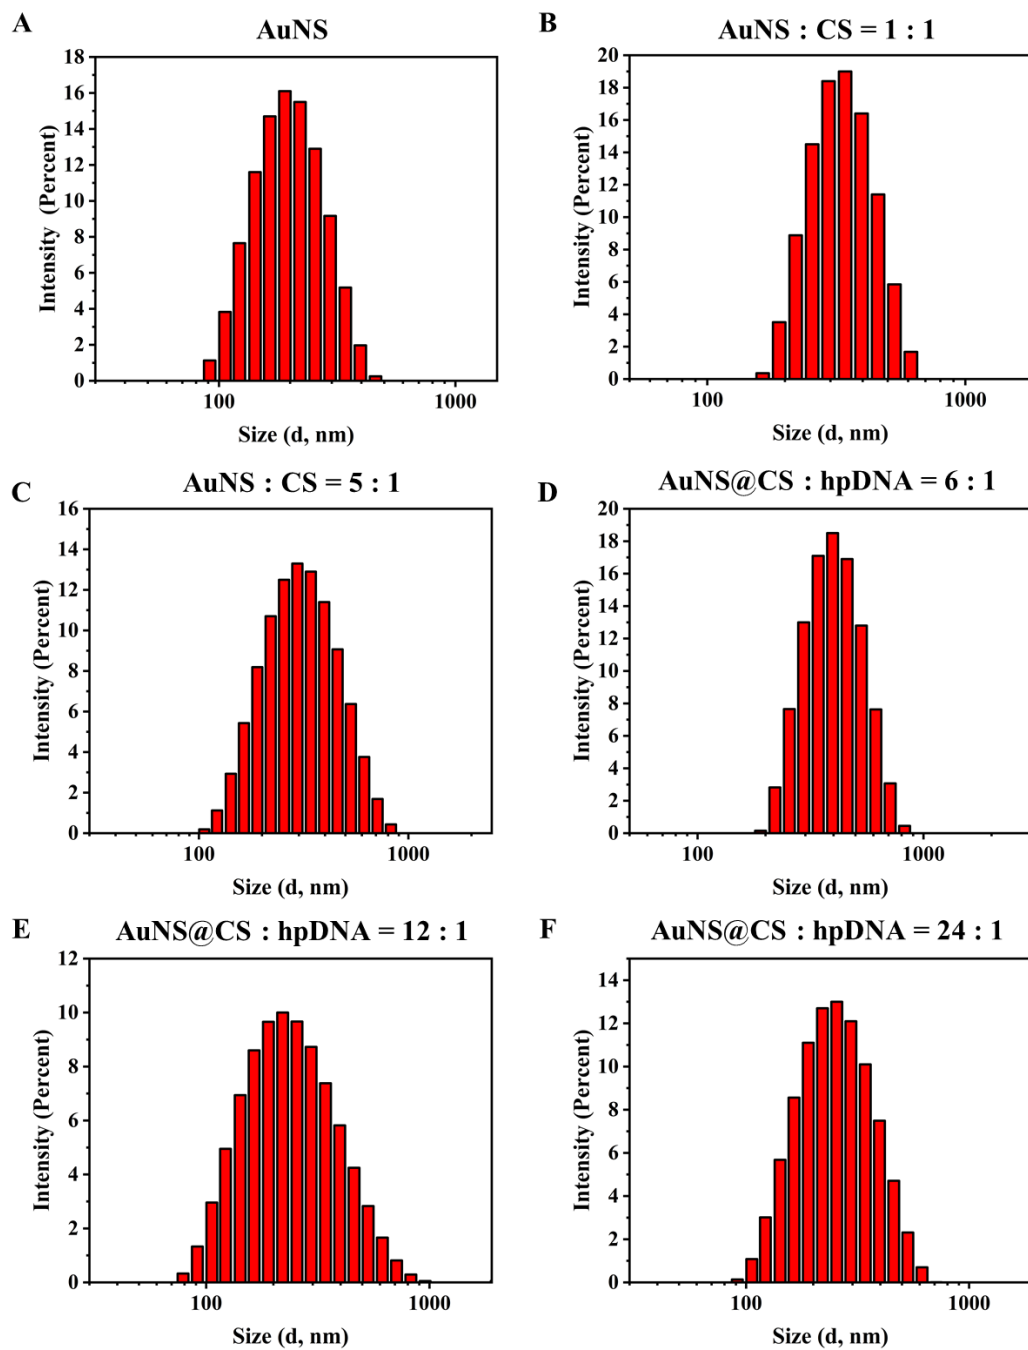

**Figure S1.** Representative histogram of size distribution measured by DLS.

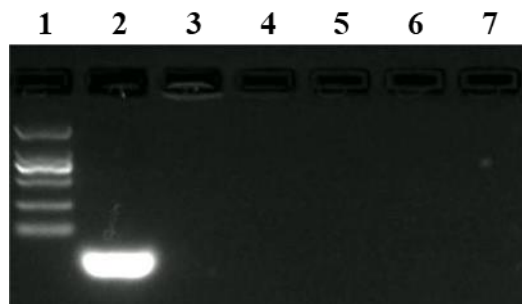

**Figure S2.** Gel electrophoresis analysis of hpDNA loading by AuNS@CS. Lane 1: DNA Maker; Lane 2: Free hpDNA; Lane 3: AuNS@CS : hpDNA = 1:1; Lane 4: AuNS@CS : hpDNA = 3:1; Lane 5: AuNS@CS : hpDNA = 6:1; Lane 6: AuNS@CS : hpDNA = 12:1; Lane 7: AuNS@CS : hpDNA = 24:1.

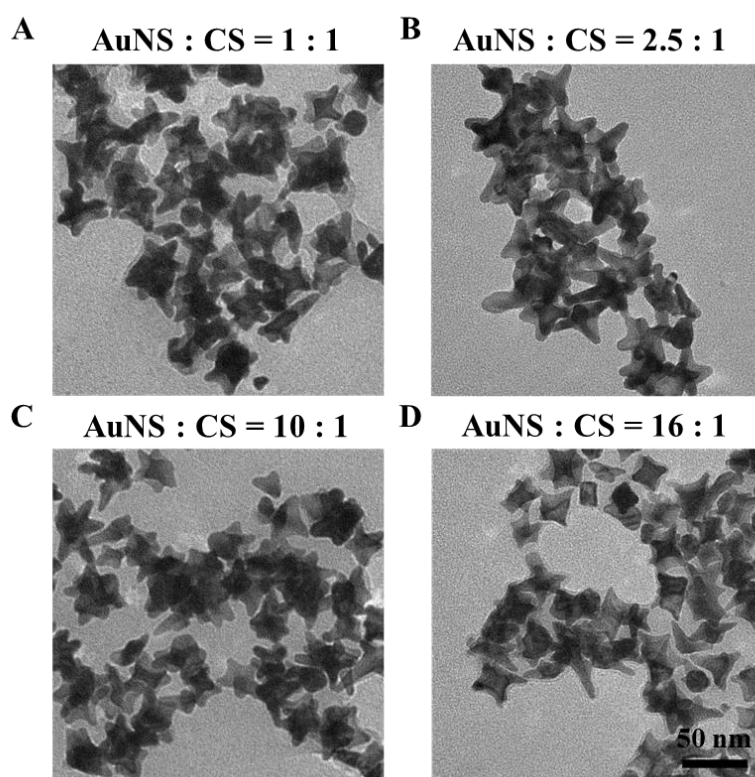

**Figure S3.** Transmission electron microscopy (TEM) images of AuNS@CS formulated at various weight ratios. Scale bars: 50 nm.

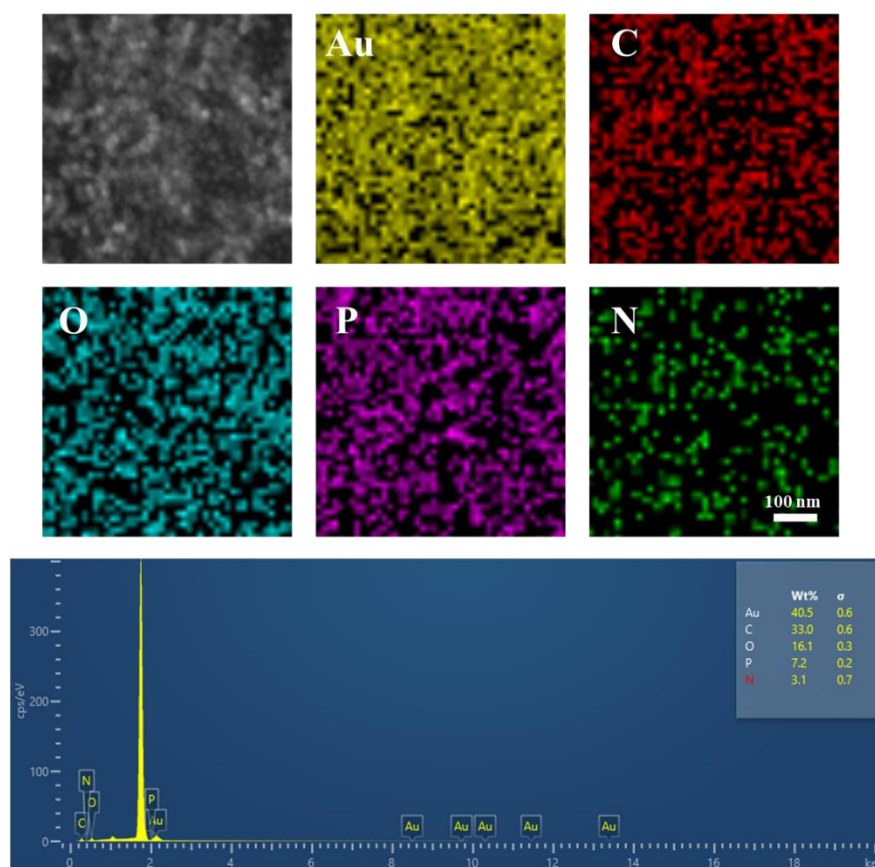

**Figure S4.** Representative SEM images, EDX elemental maps and EDX spectra of AuNS@CS-hpDNA.

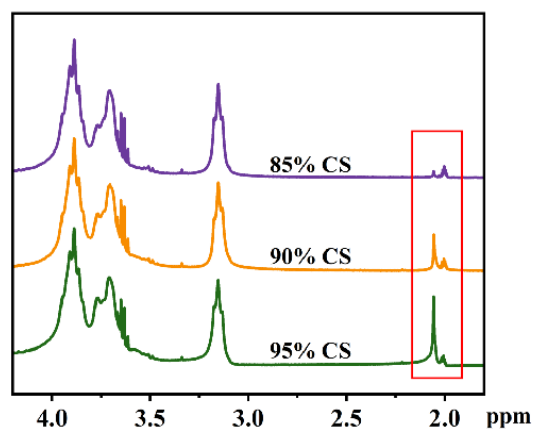

**Figure S5.**  $^1\text{H}$  NMR spectra of chitosan with different degrees of deacetylation.

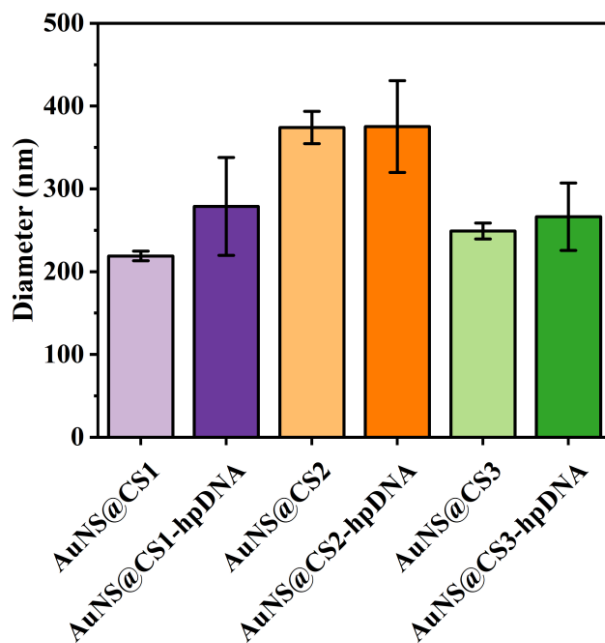

**Figure S6.** Diameter of the AuNS@CS and the AuNS@CS-hpDNA (AuNS@CS/hpDNA=12:1) formulated with different chitosan samples (CS1, CS2 and CS3) with degrees of deacetylation (85%, 90% and 95%). Error bars represent the means  $\pm$  SD (n = 3).

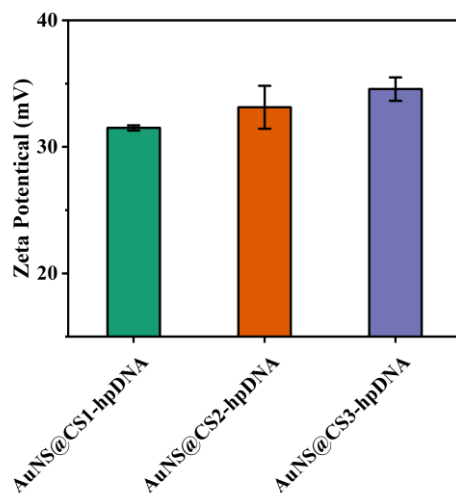

**Figure S7.** Zeta potential of AuNS@CS-hpDNA with different degrees of deacetylation (CS1, 85%; CS2, 90%; CS3, 95%).

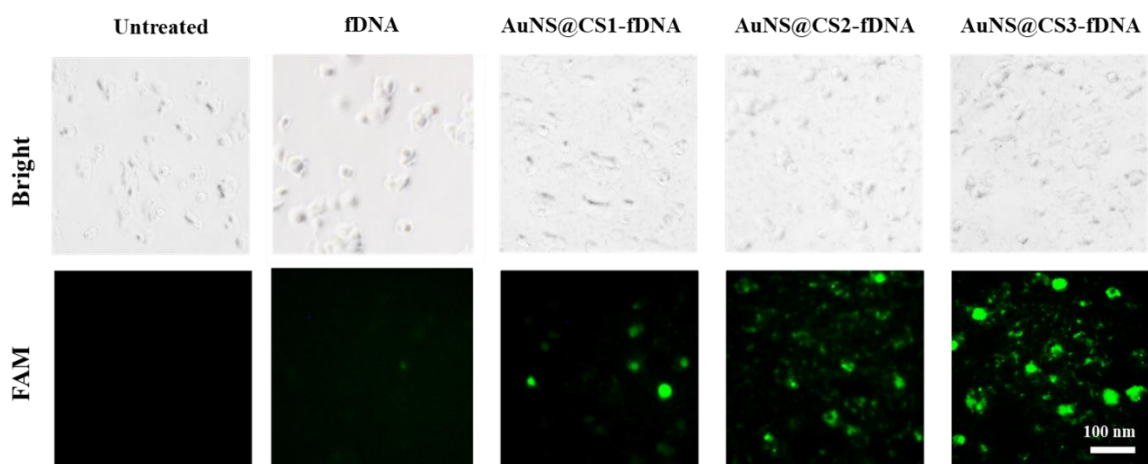

**Figure S8.** Cellular uptake of AuNS@CS-fDNA. Fluorescence microscope images displayed MCF-7 cells transfected with naked fluorescent hpDNA (fDNA) or AuNS@CS-fDNA formulated with different chitosan samples (CS1, CS2 and CS3) with deacetylation degrees (85%, 90% and 95%).

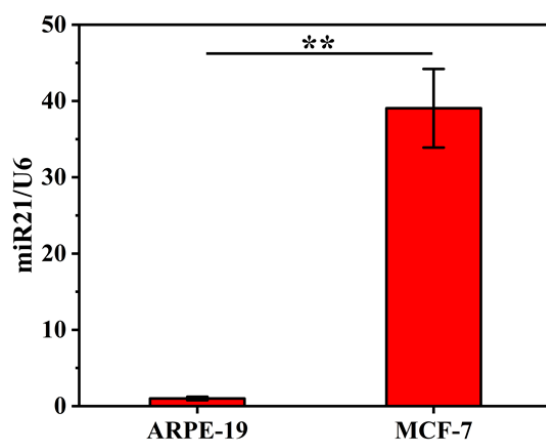

**Figure S9.** Expression level of miR21 expression levels in MCF-7 cells and ARPE-19 cells. U6 snRNA was utilized as control. Error bars represent the means  $\pm$  SD (n = 5). \*\* p < 0.01.

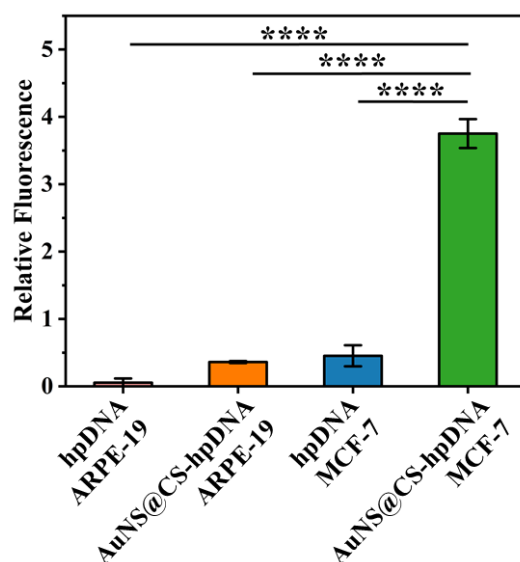

**Figure S10.** Quantification the intracellular fluorescence of hpDNA from fluorescence imaging. Fluorescence signals from ARPE-19 or MCF-7 cells with indicated treatment were quantified from the mean fluorescent intensity of sufficient number of cells. Statistical difference, \*\*\*\*  $p < 0.0001$ .

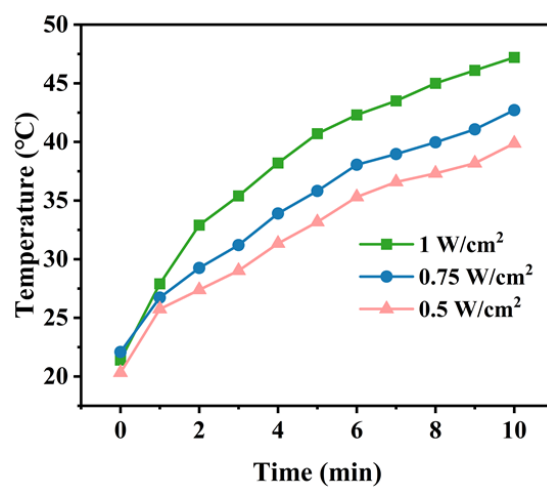

**Figure S11.** Temperature change curves of AuNS@CS during NIR laser irradiation with various laser power density.

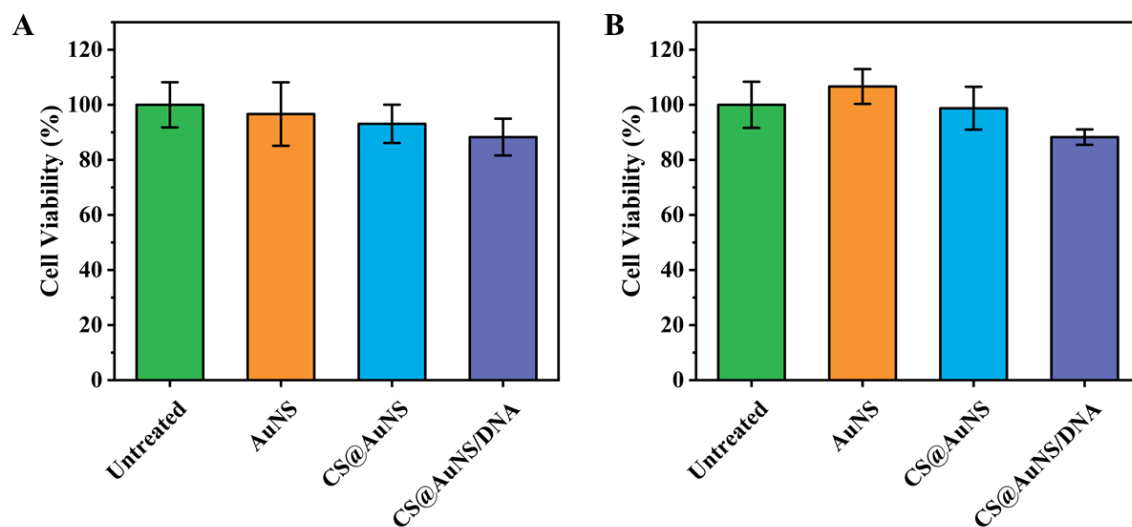

**Figure S12.** Cytotoxicity of AuNS, AuNS@CS and AuNS@CS-hpDNA on (A) MCF-7 and (B) ARPE-19 cells. Error bars represent the means  $\pm$  SD (n = 5)
